# Supplementary material for: TRIM11 Negatively Regulates IFNβ Production and Antiviral Activity by Targeting TBK1
Source: PubMed Central journal article supplement (PMC3652858; doi:10.1371/journal.pone.0063255), 2013-05-13

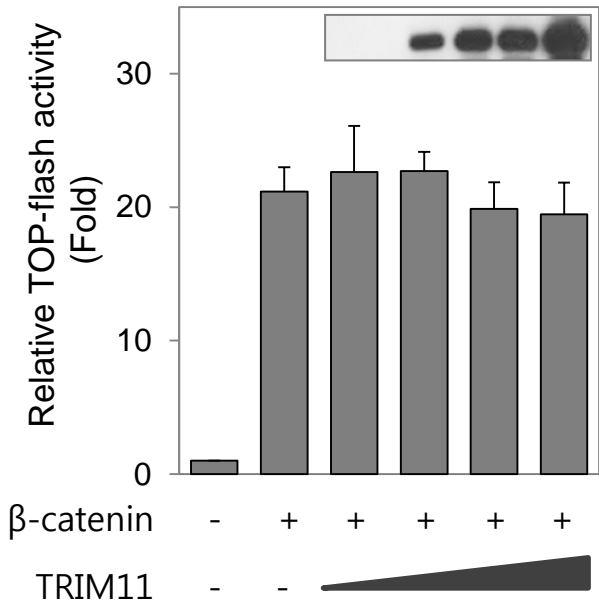

Supplement: pone.0063255.s001.pdf [file pone.0063255.s001.pdf]
