# Supplementary material for: TRIM11 Negatively Regulates IFNβ Production and Antiviral Activity by Targeting TBK1
Source: PubMed Central journal article supplement (PMC3652858; doi:10.1371/journal.pone.0063255), 2013-05-13

**A**

|           |   |   |
|-----------|---|---|
| HA-TRIM11 | - | + |
| FLAG-TBK1 | + | + |
| Ubi-His   | + | + |

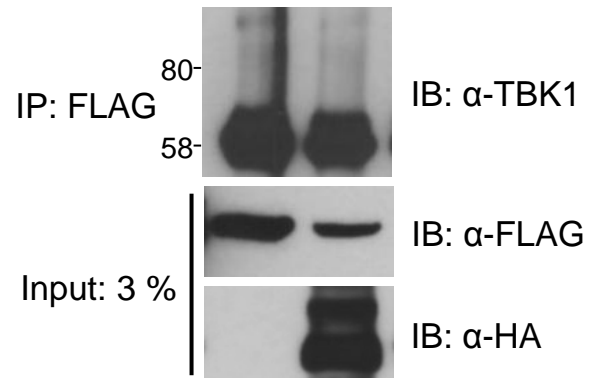**B**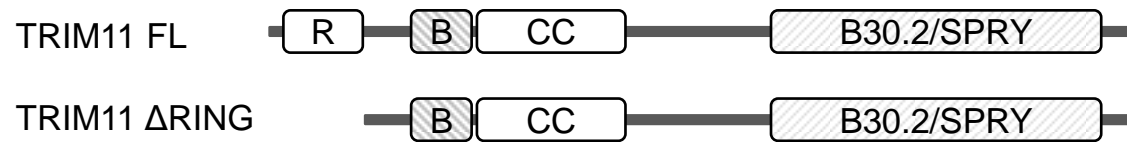**C**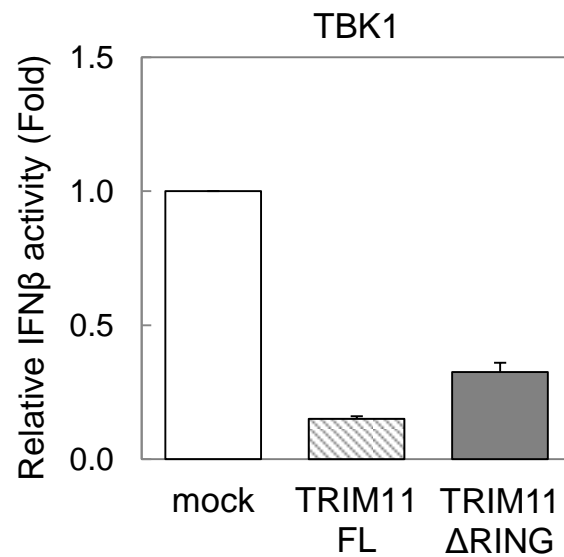

Supplement: pone.0063255.s002.pdf [file pone.0063255.s002.pdf]
