# Supplementary material for: TRIM11 Negatively Regulates IFNβ Production and Antiviral Activity by Targeting TBK1
Source: PubMed Central journal article supplement (PMC3652858; doi:10.1371/journal.pone.0063255), 2013-05-13
Supplement: pone.0063255.s003.pdf [file pone.0063255.s003.pdf]

|           |   |   |   |   |                                                                                     |   |   |
|-----------|---|---|---|---|-------------------------------------------------------------------------------------|---|---|
| ATP       | + | + | - | + | +                                                                                   | + | + |
| FLAG-TBK1 | + | - | + | + | +                                                                                   | + | + |
| FLAG-IRF3 | - | + | + | + | +                                                                                   | + | + |
| HA-TRIM11 | - | - | - | - |  |   |   |

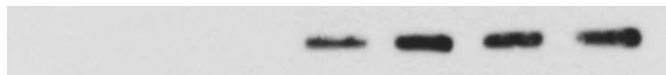

IB:  $\alpha$  - p-IRF3

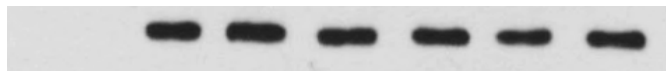

IB:  $\alpha$  - IRF3

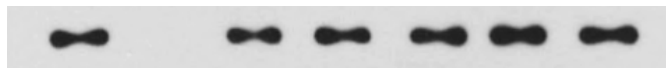

IB:  $\alpha$  - TBK1

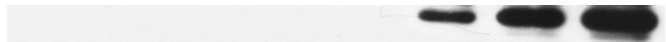

IB:  $\alpha$  - TRIM11
